1 **Can hot temperatures limit disease transmission? A test of mechanisms in a zooplankton-**  
2 **fungus system**

3 Marta S. Shocket<sup>1\*†</sup> (mshocket@stanford.edu), Alexandra Magnante<sup>1</sup>, Meghan A. Duffy<sup>2</sup>, Carla  
4 E. Cáceres<sup>3</sup>, and Spencer R. Hall<sup>1</sup>

5  
6 <sup>1</sup> Department of Biology, Indiana University, Bloomington, IN 47405 USA

7 <sup>2</sup> Department of Ecology and Evolutionary Biology, University of Michigan, Ann Arbor, MI  
8 48109 USA

9 <sup>3</sup> School of Integrative Biology, University of Illinois at Urbana-Champaign, Urbana, IL 61801

10

11 \* Corresponding Author: Marta S. Shocket, 650-723-5923, mshocket@stanford.edu

12 Current address: Stanford University

13 † Present Address: Department of Biology, Stanford University, Stanford, CA 94305

14

15 **Keywords:** *Daphnia dentifera*, fungal pathogen, host-parasite interaction, infectious disease,  
16 *Metschnikowia bicuspidata*, temperature, thermal ecology, transmission rate, upper thermal  
17 constraints, upper thermal limits

18 **Author Contributions:** SRH, CEC, and MAD designed and obtained funding for the field  
19 survey. SRH and MSS collected field data. MSS and SRH designed the laboratory studies; MSS  
20 and AM conducted them. MSS wrote the first draft of the manuscript, and all authors revised and  
21 approved the final version.

22 **Data Accessibility:** Upon acceptance, all data and code will be deposited in the Dryad Data  
23 Repository.

24  
25  
26  
27  
28  
29  
30  
31  
32  
33  
34  
35  
36  
37  
38  
39  
40  
41  
42  
43  
44  
45  
46

## ABSTRACT

1. Thermal ecology theory predicts that transmission of infectious diseases should respond unimodally to temperature, i.e., be maximized at intermediate temperatures and constrained at extreme low and high temperatures. However, empirical evidence linking hot temperatures to decreased transmission in nature remains limited.
2. We tested the hypothesis that hot temperatures constrain transmission in a zooplankton-fungus (*Daphnia dentifera*-*Metschnikowia bicuspidata*) disease system where autumnal epidemics typically start after lakes cool from their peak summer temperatures. This pattern suggested that maximally hot summer temperatures could be inhibiting disease spread.
3. Using a series of lab experiments, we examined the effects of high temperatures on five mechanistic components of transmission. We found that (1) high temperatures increased exposure to parasites by speeding up foraging rate but (2) did not alter infection success post-exposure. (3) High temperatures lowered parasite production (due to faster host death and an inferred delay in parasite growth). (4) Parasites made in hot conditions were less infectious to the next host (instilling a parasite 'rearing' or 'trans-host' effect of temperature during the prior infection). (5) High temperatures in the free-living stage also reduce parasite infectivity, either by killing or harming parasites.
4. We then assembled the five mechanisms into an index of disease spread. The resulting unimodal thermal response was most strongly driven by the rearing effect. Transmission peaked at intermediate-hot temperatures (25-26°C) and then decreased at maximally hot temperatures (30-32°C). However, transmission at these maximally hot temperatures only trended slightly lower than the baseline control (20°C), which easily sustains epidemics

47 in laboratory conditions and in nature. Overall, we conclude that while exposure to hot  
48 epilimnetic temperatures does somewhat constrain disease, we lack evidence that this  
49 effect fully explains the lack of summer epidemics in this natural system. This work  
50 demonstrates the importance of experimentally testing hypothesized mechanisms of  
51 thermal constraints on disease transmission. Furthermore, it cautions against drawing  
52 conclusions based on field patterns and theory alone.

53  
54  
55  
56  
57  
58  
59  
60  
61  
62  
63  
64  
65  
66  
67  
68  
69  
70  
71  
72  
73  
74  
75

## INTRODUCTION

How do high temperatures affect the spread of infectious diseases? In the current prevailing view, warming from climate change will shift the geographic range of diseases: some new areas will become warm enough to support disease, whereas others that previously sustained disease will become too hot (Altizer, Ostfeld, Johnson, Kutz, & Harvell, 2013; Lafferty, 2009; Lafferty & Mordecai, 2016). This hypothesis stems from a principle of thermal biology: most biological traits have unimodal reaction norms, where performance peaks at intermediate temperatures and declines to zero at cooler and warmer temperatures (Dell, Pawar, & Savage, 2011). Thus, once temperatures exceed the thermal optima of traits driving transmission, disease should decline. Many models predict upper thermal constraints on diseases, such as for helminthic parasites of Arctic ungulates (Molnár, Kutz, Hoar, & Dobson, 2013), a rhizocephalan crab parasite (Gehman, Hall, & Byers, 2018), human schistosomiasis (Mangal, Paterson, & Fenton, 2008), a microsporidian *Daphnia* parasite (Kirk et al., 2018), and mosquito-borne diseases (Mordecai et al., 2017, 2013; Paull et al., 2017; Shocket, Ryan, & Mordecai, 2018; Tesla et al., 2018). Additionally, there is evidence for upper thermal constraints on disease in natural populations of grasshoppers infected by a fungal pathogen (Carruthers, Larkin, & Firstencel, 1992), the rhizocephalan crab parasite (Gehman et al., 2018), amphibians infected by chytrid fungus (Berger et al., 2004; Raffel, Michel, Sites, & Rohr, 2010), bats infected with white-nose fungus (Langwig et al., 2015), and mosquito-borne human pathogens (Gatton, Kay, & Ryan, 2005; Mordecai et al., 2013; Peña-García, Triana-Chávez, & Arboleda-Sánchez, 2017; Perkins, Metcalf, Grenfell, & Tatem, 2015). However, temperature often co-varies with other seasonal environmental factors (Altizer et al., 2006), so causally linking temperature to observed field patterns of disease is challenging (Altizer et al., 2006; Pascual & Dobson, 2005). Thus, the

76 generality of upper thermal constraints excluding disease remains unclear.

77           Conceptually, upper thermal constraints act like fever, taking advantage of a common  
78 thermal mismatch between hosts and parasites. Because hosts can often withstand hotter  
79 environments than their parasites, many animals increase their body temperature when infected  
80 (Thomas & Blanford, 2003; see others below). In endothermic vertebrates, fever arises internally  
81 via cytokines and the central nervous system (Conti, Tabarean, Andrei, & Bartfai, 2004). In  
82 ectotherms, fever arises from behavioral thermoregulation (microhabitat selection) and is  
83 widespread, occurring in amphibians (Richards-Zawacki, 2009; but see Sauer et al., 2018),  
84 reptiles (Zimmerman, Vogel, & Bowden, 2010), fish (Boltaña et al., 2013), snails (Zbikowska,  
85 Wrotek, Cichy, & Kozak, 2013), and insects (Anderson, Blanford, Jenkins, & Thomas, 2013;  
86 Carruthers et al., 1992; McClain, Magnuson, & Warner, 1988; Stahlschmidt & Adamo, 2013;  
87 Thomas & Blanford, 2003). In both types of fever, high temperatures can impair parasite  
88 performance, enhancing clearance or reducing virulence of infection. An analogous process can  
89 occur within ectothermic hosts inhabiting high ambient temperatures (regardless of infection  
90 status)—in essence, an environmental fever. High ambient temperatures can also harm parasites  
91 with free-living stages outside of hosts. Mechanistically linking high temperatures to reduced  
92 disease requires examining thermal effects on components of the transmission process  
93 (McCallum et al. 2017). We use the term ‘transmission (process)’ to broadly refer to the full  
94 parasite life cycle, including infective propagule production and propagule survival in the  
95 environment; we also use ‘transmission rate’ as it is narrowly defined as the rate of new  
96 infections (i.e., the parameter ‘ $\beta$ ’ calculated from the infection prevalence and the density of  
97 hosts and parasites; McCallum et al. 2017).

98           Here, we evaluate several possible mechanisms for upper thermal constraints on disease

99 transmission in a planktonic-fungal system. Autumnal epidemics start once lake waters cool  
100 below summer maxima (Fig. 1A). These delayed starts could reflect hot temperatures inhibiting  
101 disease if they push any of five transmission components past their thermal optima. First, hot  
102 temperatures could slow host feeding and lower consumption-based exposure to parasites.  
103 Second, hot temperatures could lower parasite infectivity inside hosts, lowering the probability  
104 of successful infection (via effects on hosts and/or parasites). Third, hot temperatures could  
105 decrease the quantity of parasite propagules [spores] produced by an infection. This decrease  
106 could stem from slower host growth rate (since parasite production often scales with host  
107 growth: Hall, Knight, et al., 2009; Hall, Simonis, Nisbet, Tessier, & Cáceres, 2009), slower  
108 parasite growth independent from host growth, or enhanced mortality of infected hosts  
109 (truncating production time; Auld, Hall, Housley Ochs, Sebastian, & Duffy, 2014; Civitello,  
110 Forsy, Johnson, & Hall, 2012). Fourth, hot temperatures could lower the quality of parasite  
111 spores released from dead hosts into the environment (Shocket, Vergara, et al., 2018). Finally,  
112 these free-living spores could be harmed or killed by hot temperatures. Thus, high temperatures  
113 could constrain this fungal disease at multiple stages of the transmission process.

114 Using a series of experiments, we tested upper thermal constraints on transmission via the  
115 five mechanisms described above (Fig. 1B). Hot temperatures increased exposure to parasites by  
116 speeding up foraging rate ( $f$ , mechanism 1) without lowering parasite infectivity within hosts ( $u$ ,  
117 mechanism 2). Hot temperatures reduced the number of parasites produced ( $\sigma$ , mechanism 3).  
118 This decrease stemmed from faster host death and an inferred delay in parasite production, but  
119 not depressed host or parasite growth rates. Parasites produced at hot temperatures were less  
120 infectious to the next host, instilling a parasite 'rearing' or 'trans-host' effect on spore quality ( $\rho$ ,  
121 mechanism 4), analogous to trans-generational effects in hosts (Shocket, Vergara, et al., 2018).

122 Hot temperatures also either harmed or killed parasites in the free-living stage, lowering their  
123 estimated infectivity ( $\phi$ , mechanism 5). We assembled these effects into an index of potential  
124 disease spread ('transmission potential'). The resulting unimodal thermal response was driven  
125 most strongly by the rearing effect. Potential transmission peaked at intermediate-hot  
126 temperatures (25-26°C) and then decreased at maximally hot temperatures (30-32°C). However,  
127 potential transmission at maximally hot temperatures only trended slightly lower than the  
128 baseline control temperature (20°C), which easily sustains epidemics in laboratory conditions  
129 and nature. Overall, we conclude that exposure to high temperatures does somewhat constrain  
130 disease, but we lack evidence that it fully explains the lack of summer epidemics in this system.

131

132

### STUDY SYSTEM

133 The hosts (*Daphnia dentifera*; hereafter 'hosts') are dominant zooplankton grazers in  
134 many freshwater temperate lakes across the Midwestern United States (Tessier & Woodruff,  
135 2002). Some populations experience epidemics of the virulent fungal parasite *Metschnikowia*  
136 *biscupidata* (hereafter 'fungus'; Hall et al., 2010; Penczykowski, Hall, Civitello, & Duffy, 2014).  
137 Maximum prevalence can reach up to 60% (Penczykowski, Hall, et al., 2014). Hosts become  
138 infected when they filter-feed on algae and inadvertently consume fungal spores (Hall et al.,  
139 2007). The spores pierce the host's gut wall, entering its body cavity. Inside, fungal conidia  
140 replicate in the hemolymph before maturing into new spores (Stewart Merrill & Cáceres, 2018).  
141 Following host death from infection, spores are released into the water for new hosts to consume  
142 (Ebert, 2005).

143

144 The seasonality of epidemics motivated the present focus on high temperatures.  
Epidemics typically begin in late summer or early fall (August–October) and wane in late fall or

145 early winter (November–December; Hall, Becker, Duffy, & Cáceres, 2011; Penczykowski, Hall,  
146 et al., 2014). During this time, lake water temperature declines (Shocket, Strauss, et al., 2018).  
147 Many traits that influence disease spread (demographic traits of hosts, transmission rate, and  
148 spore production) change plastically with temperature (Hall, Tessier, Duffy, Huebner, &  
149 Cáceres, 2006; Shocket, Strauss, et al., 2018). Transmission increases with constant temperatures  
150 up to 26°C, and hosts cannot be cultured in constant temperatures above 27°C (Shocket, Strauss,  
151 et al., 2018). However, organisms can withstand otherwise lethal high temperatures in a  
152 fluctuating environment (Niehaus, Angilletta, Sears, Franklin, & Wilson, 2012). For instance, in  
153 our stratified lakes, hosts regularly experience temperatures exceeding 27°C (typically maxima  
154 of 29–32°C; Fig. 1A) in summer: they migrate between the colder, deeper hypolimnion during  
155 day (to avoid mortality from visually oriented fish predators) and the warmer, upper epilimnion  
156 at night (to take advantage of greater algal resources and faster growth in warmer temperatures)  
157 (Hall, Duffy, Tessier, & Cáceres, 2005; Lampert, 1989). Epidemics often begin as lakes start to  
158 cool from maximum summer temperatures (Fig. 1A). This pattern suggested that high  
159 temperatures could constrain disease spread, as predicted by theory of thermal disease ecology  
160 (Lafferty, 2009; Lafferty & Mordecai, 2016).

161

162

## METHODS

### 163 **Field Survey**

164 Field survey data generated the motivating pattern, i.e. the relationship between epidemic  
165 start date and epilimnetic temperature (Fig. 1A). We surveyed 10–28 lakes in southwestern  
166 Indiana (Greene and Sullivan Counties) weekly (2009 – 2011) or bi-weekly (2013 - 2014) from  
167 August to December. For each visit, we collected a zooplankton sample (13 cm diameter net



168 with 153  $\mu\text{m}$  mesh) and measured lake water temperature data at 0.5–1 meter intervals with a  
169 Hydrolab multiprobe (Hach Environmental). For each sample, we visually diagnosed 400+ live  
170 hosts with a dissecting scope (20-50X magnification). An epidemic ‘started’ when infection  
171 prevalence first exceeded 1% for two consecutive sampling visits (Shocket, Strauss, et al., 2018).  
172 We calculated the epilimnetic temperature by fitting a spline to temperature across water depth,  
173 and averaging from the water surface to the depth where the temperature gradient first exceeded  
174  $1^\circ\text{C m}^{-1}$  (i.e., the thermocline; see Hite et al. 2016 Appendix S2).

175

## 176 **General Approach**

177 We measured how high temperatures influence five mechanistic components of the  
178 transmission process with laboratory assays (Table 1). Then we combined them into a synthetic  
179 index of disease spread: ‘transmission potential’ (Auld et al., 2014). For mechanisms involving  
180 the host or host-parasite interaction (mechanisms 1-3: foraging rate [ $f$ ], spore infectivity from  
181 within-host processes [ $u$ ], and spore yield [ $\sigma$ ]), we used fluctuating temperatures to expose hosts  
182 to high temperatures for part of the day (they cannot survive constant temperatures  $>27^\circ\text{C}$ ).  
183 Hosts were kept on a 16:8 light:dark cycle. All hosts experienced the same  $20^\circ\text{C}$  temperature for  
184 8 hours, and then 20, 26, or  $32^\circ\text{C}$  for 16 hours (‘maximum temperature’). For mechanisms 4-5  
185 (rearing effect on spore quality [ $\rho$ ] and free-living spore effect [ $\phi$ ]), we conducted common  
186 garden infection assays (using uniform groups of hosts at constant  $20^\circ\text{C}$ ) with spores from  
187 different treatments. Thus, variation in transmission rate can be attributed to differences in spore  
188 infectivity. Temperatures varied slightly among experiments (25 or  $26^\circ\text{C}$ , 30 or  $32^\circ\text{C}$ ) based on  
189 incubator availability. For calculating transmission potential, we treat temperature categorically  
190 and pool these treatments.

191 For all parameters, we bootstrapped 95% confidence intervals (data sampled within  
192 groups, with replacement; 10,000 samples). For parameters calculated at the population level ( $\beta$ ,  
193  $u$ ,  $\rho$ , and  $\varphi$ ), we used randomization tests to compare temperature treatments (treatment labels  
194 shuffled among host individuals, without replacement; 10,000 samples). For  $\sigma$  we used model  
195 selection with AIC to compare treatments. For  $f$  and transmission potential (for which traditional  
196 statistical tests were not available), we used the bootstrapped distributions to compare treatments.  
197 Specifically, we calculated the cumulative probability density of the best estimate from one  
198 treatment according to the bootstrapped distribution of the other. These PD-values are analogous  
199 to  $p$ -values. We considered treatments significantly different if  $PD < 0.025$ . See Appendix for  
200 details and a complete list of statistical tests and results.

201 Due to time and incubator constraints, we were unable to replicate the experiment across  
202 multiple incubators. Thus, our temperature treatments are ‘pseudo-replicated’ in that all the  
203 replicates for a single temperature treatment were conducted in the same incubator at the same  
204 time. Accordingly, our results may be influenced by random incubator effects.

205

## 206 **Mechanisms 1 & 2: Foraging rate ( $f$ ) and spore infectivity from within-host processes ( $u$ )**

207 We measured foraging rate of hosts by comparing the fluorescence of ungrazed and  
208 grazed algae (Penczykowski, Lemanski, et al., 2014; Sarnelle & Wilson, 2008). We added  
209 estimates of foraging rate at 30°C to those at 20 and 25°C presented elsewhere using the same  
210 methods (Shocket, Vergara, et al., 2018). In both experiments, we measured foraging rate across  
211 a gradient of host body size (Kooijman, 2009) to index foraging at a common size among  
212 experiments (1.5 mm). We used maximum likelihood estimation (MLE) to fit size-dependent  
213 functions of foraging with the ‘bbmle’ package (Bolker & R Development Core Team, 2017) in

214 R (R Core Team, 2017). See Appendix for details.

215 We measured how high temperature impacts transmission rate ( $\beta$ ) and spore infectivity  
216 from within-host processes ( $u$ ) with an infection assay (' $\beta + u$  measurement assay'). For  
217 successful infection, the fungus must break through the host gut barrier and then develop and  
218 replicate within the host hemolymph. High temperatures could inhibit the parasite during either  
219 process. Thus, we factorially manipulated the maximum temperature (20 and 32°C) during  
220 parasite exposure and infection establishment (for four exposure/infection establishment  
221 treatments: 20/20, 20/32, 32/20, and 32/32°C). This approach reveals if high temperature  
222 interferes with initial gut penetration or subsequent establishment of infection (similar to Allen &  
223 Little, 2011). Hosts were exposed individually in their 'exposure temperature' for 24 hours, then  
224 moved to their 'infection establishment temperature.' Later, hosts were visually diagnosed for  
225 infection. Transmission rate was calculated from proportion infected (see Appendix). We  
226 calculated spore infectivity from within-host processes ( $u$ ) for each treatment by dividing  
227 transmission rate ( $\beta$ ) by foraging rate ( $f$ ) at the exposure temperature ( $u=\beta/f$ ).

228

### 229 **Mechanism 3: Spore yield ( $\sigma$ ) and related host and parasite traits**

230 We measured how high temperatures impact final spore yield ( $\sigma$ ) of infected hosts that  
231 died from their infection. This trait estimates release of spores into the environment. We pooled  
232 spore yields from the  $\beta + u$  measurement assay (above, treatments: 20/20 and 32/32°C) and the  
233 within-host parasite growth assay (below, treatments = 20, 26, and 32°C) since they did not  
234 differ statistically (20°C:  $p = 0.65$ ; 32°C  $p = 0.93$ ). We tested for differences between  
235 temperatures by fitting a suite of models via MLE: in each model spore yield was normally  
236 distributed and temperature treatments could exhibit the same or different means and standard

237 deviations. We compared models using AIC and calculated  $p$ -values with likelihood ratio tests.

238 To distinguish between three possible mechanisms driving the thermal response of spore  
239 yield, we quantified related host and parasite traits. First, we measured host growth rate ( $g_h$ ) with  
240 a juvenile growth rate assay (Lampert & Trubetskova, 1996)(see Appendix), since spore yield  
241 often scales with  $g_h$  (e.g., with different host food resources: Hall, Knight, et al., 2009; Hall,  
242 Simonis, et al., 2009). We compared treatments with t-tests. Second, we measured parasite  
243 growth (i.e., number of mature spores within hosts over time) using a sacrifice series (‘within-  
244 host parasite growth assay;’ see Appendix), since spore yield could decline if the number of  
245 parasites grows more slowly, independently of host condition (Thomas & Blanford, 2003). We  
246 fit and bootstrapped linear models of ‘spore load’ over time to estimate parasite growth rate ( $g_p$ ,  
247 the model slope). ‘Spore load’ estimates included spores in living (i.e., sacrificed) hosts, unlike  
248 ‘spore yield,’ which was calculated only from dead hosts that were killed by the parasite. Spore  
249 yield is directly relevant for the epidemiology of the system, while spore load simply measures  
250 one of the underlying processes (parasite growth rate per day,  $g_p$ ) that contributes to spore yield.  
251 Spore load increased linearly over the full time series at 26 and 32°C. Spore load plateaued after  
252 day 19 at 20°C, so we truncated the time series to estimate the linear slope for only that portion.  
253 Finally, we calculated death rate ( $d$ ) of the infected hosts used to estimate spore yield (see  
254 Appendix), since spore yield can decline with shorter host lifespan (Auld et al., 2014; Civitello et  
255 al., 2012). We compared treatments with randomization tests.

256

#### 257 **Mechanisms 4 & 5: rearing ( $\rho$ ) and free-living spore ( $\varphi$ ) effects on infectivity**

258 We measured how high temperatures modify spore infectivity prior to encountering the  
259 focal host via a rearing effect on baseline spore quality ( $\rho$ ) and harm to free-living spores ( $\varphi$ ). We

260 conducted infection assays on ‘common garden’ groups of hosts at 20°C using different spore  
261 treatments (i.e., from different spore rearing temperatures for  $\rho$  and from different spore  
262 incubation temperatures for  $\varphi$ ). Thus, variation in transmission rate reflects differences in spore  
263 infectivity. To measure  $\rho$ , we conducted two assays, one with spores produced in the  $\beta + u$   
264 measurement assay (20/20 and 32/32°C treatments only) and another with spores produced in the  
265 within-host parasite growth assay (20, 26, and 32°C treatments). To measure  $\varphi$ , we used spores  
266 incubated at three temperatures (20, 25, and 30°C) for two durations (1-day and 7-days) in  
267 constant, non-fluctuating temperatures (since spores do not migrate between stratified water  
268 layers). One-day incubations were stored at 4°C for the first six days (standard procedure for  
269 spore storage). For both experiments, we estimated transmission rates ( $\beta$ ) from the prevalence  
270 data (see Appendix).

271 Both mechanisms influence transmission by modifying spore infectivity (already  
272 estimated from within-host processes as  $u$ , mechanism 1). Thus, in order to incorporate these  
273 additional mechanisms into a synthetic metric for disease spread (transmission potential, see  
274 below), we calculated unit-less rearing ( $\rho$ ) and free-living ( $\varphi$ ) effects standardized to infectivity  
275 at 20°C. Specifically, we calculated the parameters by dividing the estimates for transmission  
276 rate ( $\beta$ ) at 26 and 32°C by that at 20°C. Given this calculation, values of  $\rho < 1$  or  $\varphi < 1$  mean  
277 spores are less infectious due to rearing or free-living effects than at 20°C, respectively;  
278 conversely, values  $> 1$  mean spores are more infectious than at 20°C. To calculate confidence  
279 intervals at 20°C, we divided the bootstrapped distribution by a randomly-shuffled version of  
280 itself. Additionally, because harm to free-living spores occurs over time as spores are removed  
281 by hosts, we used a simple model to estimate time-weighted transmission rates for  $\varphi$ . We  
282 assumed that spore infectivity declined linearly over the 7-day assay (above), and that hosts

283 consume spores at a constant foraging rate (resulting in an exponential decay in spores remaining  
284 over time). Thus, we weighted the estimated transmission rate on each day by the proportion of  
285 spores consumed by hosts on that day (see Appendix for detailed methods and a sensitivity  
286 analysis of the time-weighted transmission model).

287

## 288 **Transmission potential**

289 We calculated an index of disease spread to synthesize the effects of all five mechanisms.  
290 We defined transmission potential as the product of all five parameters ( $f u \sigma \rho \phi$ ). We generated  
291 confidence intervals using the bootstrapped parameter distributions. To visualize the contribution  
292 of each parameter, we calculated transmission potential from all possible four-parameter  
293 combinations, holding the fifth constant at its 20°C point estimate. These values reveal how each  
294 parameter affects the magnitude and uncertainty of transmission potential (hence, it is a type of  
295 sensitivity analysis).

296

297

## RESULTS

### 298 **Mechanisms 1 & 2: Foraging rate ( $f$ ) and spore infectivity from within-host processes ( $u$ )**

299 Contrary to our predictions, high temperature did not lower transmission rate ( $\beta$ ) during  
300 either stage (exposure or infection establishment; Fig. 2A). Instead, transmission rate was higher  
301 when hosts were exposed at 32°C than at 20°C (20°C infection establishment:  $p=0.0013$ ; 32°C  
302 infection establishment:  $p<0.0001$ ). Temperature during infection establishment exerted no effect  
303 on transmission rate (20°C exposure:  $p=0.10$ ; 32°C exposure:  $p=0.31$ ). When exposure and  
304 establishment temperatures were equal (as in nature; the 20/20 and 32/32°C treatments here),  
305 transmission rate was higher at 32°C than at 20°C ( $p=0.0068$ ). Thus, even at maximal

306 epilimnetic temperatures, the impacts of higher temperatures on transmission rate promoted  
307 rather than inhibited disease.

308         The thermal response of transmission rate was mechanistically driven by foraging rate of  
309 hosts ( $f$ ), not spore infectivity from within-host processes ( $u$ ). Foraging rate increased from 20 to  
310 25°C ( $PD=0$ ; see Methods and Appendix for a description of PD values, which are analogous but  
311 not identical to  $p$ -values) and then plateaued at 30°C ( $PD=0.11$ ; Fig. 2B). Thus, hosts encounter  
312 more spores at 25 and 30°C than at 20°C. After we accounted for predicted host-parasite contact,  
313 spore infectivity was fairly insensitive to high temperatures (Fig. 2C). Temperature during  
314 infection establishment did not impact spore infectivity (20°C exposure:  $p=0.10$ ; 32°C exposure:  
315  $p=0.31$ ). Exposure temperature increased spore infectivity (20°C infection establishment:  
316  $p=0.034$ ; 32°C infection establishment:  $p=0.0052$ ), but in the opposite direction of the  
317 hypothesized mechanism (hotter temperature increased infectivity). When exposure and infection  
318 establishment temperatures were equal (as in nature), spore infectivity did not differ ( $p=0.37$ ).  
319 Thus, high temperatures increased the foraging rate of hosts, elevating host contact with spores,  
320 while spore infectivity barely changed. These changes in parasite exposure led to more  
321 transmission at high temperatures.

322

### 323 **Mechanism 3: Spore yield ( $\sigma$ ) and other measures of host and parasite growth**

324         Final spore yield ( $\sigma$ ) in hosts that died from infection was lower at 32°C than at 20 and  
325 26°C (Fig. 3A; best-fitting model had two means, see table S2 for model AIC scores and Akaike  
326 weights.) This pattern was not explained by host condition estimated via growth rate. Host  
327 growth rate ( $g_h$ , Fig. 3B) always increased with temperature (20 versus 26°C:  $p=4.7 \times 10^{-6}$ ; 26 vs.  
328 32°C:  $p=0.00038$ ). Instead, the pattern was explained by a combination of death rates of hosts

329 and delays in spore maturation. Infected hosts died more quickly at 26°C than at 20°C  
330 ( $p < 0.0001$ ), and death rate trended higher from 26 to 32°C ( $p = 0.063$ ; Fig. 3C). Meanwhile,  
331 growth rate of mature parasite spores ( $g_p$ , time series in Fig. 3D, linear slopes [growth rate] in  
332 Fig. 3E) did not change with temperature (all  $PD > 0.15$ ). However, temperature did affect the  
333 timing of initial spore production within hosts (i.e., intercepts of linear model). At the earliest  
334 point in the sacrifice series (day 8), spore load was highest at 26°C, intermediate at 32°C, and  
335 nearly zero at 20°C (Fig. 3D). Given thermally insensitive daily growth rates of parasites ( $g_p$ ;  
336 Fig. 3E), these head-starts were maintained over time (Fig. 3D). This effect on early spore  
337 production, coupled with host death rate (Fig. 3C), explains the spore yield pattern. Final spore  
338 yield was lower at 32 than 26°C because there were fewer spores initially (on day 8) and hosts  
339 died more quickly (less time to produce spores). At 20°C, spore production started even later, but  
340 the delay was compensated for by the much longer lifespans of infected hosts (lower death rate,  
341  $d$ ; Fig. 3C).

342

#### 343 **Mechanisms 4 & 5: rearing ( $\rho$ ) and free-living spore ( $\varphi$ ) effects on infectivity**

344 Spore infectivity (measured as transmission rate) responded unimodally to temperature in  
345 the previous infection (rearing effect on spore quality,  $\rho$ ; Fig. 4A). Infectivity increased  
346 significantly for spores made at 20 versus 26°C for one of two spore sources ( $p = 0.0083$  for  
347 spores from  $\beta + u$  measurement assay [square, Fig. 4A];  $p = 0.092$  for spores from within-host  
348 growth assay [diamond]). Infectivity then declined for spores made at 26 versus 32°C ( $p = 0.0001$   
349 for both spore sources). Infectivity was significantly lower for spores made at 32 versus 20°C for  
350 one of two spore sources ( $p = 0.16$  for spores from  $\beta + u$  measurement assay [square];  $p = 0.026$  for  
351 spores from within-host growth assay [diamond]). The parameter  $\rho$  (Fig. 4C) shows the rearing



352 effect pooled for both spore sources and normalized by transmission rate at 20°C (for use in the  
353 transmission potential calculation).

354 The thermal environment of free-living spores also impacted their infectivity ( $\phi$ ; Fig  
355 4B,D). Spore infectivity decreased with higher incubation temperatures after 7 days (20 versus  
356 25°C:  $p=0.0031$ ; 25 versus 30°C:  $p<0.0001$ ; diamonds on Fig. 4B). However, spore infectivity  
357 did not change after 1-day incubations (flat line in Fig. 4B [squares]; 20 versus 25°C:  $p=0.65$ , 25  
358 versus 30°C:  $p=0.64$ ). All 1-day incubations used stored (refrigerated) spores. They had lower  
359 infectivity than the 7-day incubation at 20°C, likely because storage at 4°C also lowers spore  
360 infectivity (1 versus 7-day incubations at 20°C:  $p<0.0001$ ; Duffy *unpublished data*). The  
361 parameter  $\phi$  (Fig. 4D) shows the free-living spore effect assuming that spores lose infectivity  
362 gradually over seven days as they are consumed by hosts (see *Methods* and Appendix) and  
363 normalized by transmission rate at 20°C (for use in the transmission potential calculation).

364

### 365 **Transmission potential ( $f u \sigma \rho \phi$ )**

366 Transmission potential, the product of all mechanisms ( $f u \sigma \rho \phi$ ), responded unimodally  
367 to high temperatures. This metric first increased from 20 to 25/26°C ( $PD=0.017$ ); then, it  
368 decreased from 25/26 to 30/32°C ( $PD=0.0001$ ; ‘full transmission potential’; Fig. 5A).  
369 Transmission potential at 30/32°C trended lower than at 20°C ( $PD=0.11$ ), but this difference was  
370 not significant. Thus, high temperatures do not constrain disease enough via these five  
371 mechanisms to explain absence of summer epidemics.

372 The initial increase in transmission potential from 20 to 25/26°C was driven most  
373 strongly by host foraging ( $f$ , mechanism 1) and the rearing effect on spore quality ( $\rho$ , mechanism  
374 4): holding either trait constant removes the significant difference between temperatures (Fig. 5B

375 and 5E, respectively). The subsequent drop in transmission potential from 25/26 to 30/32°C was  
376 driven most strongly by the rearing effect ( $\rho$ ): holding it constant again removes the significant  
377 difference (Fig. 5E). Harm to free-living spores ( $\varphi$ , mechanism 5) also contributes somewhat  
378 (Fig. 5F vs. Fig. 5A), though not enough to affect the statistical significance. Additionally, the  
379 thermal response of host foraging ( $f$ ) is key for maintaining transmission at high temperatures:  
380 without increased exposure to spores, the remaining mechanisms would significantly reduce  
381 transmission at 30/32°C compared to 20°C (Fig 5B). Spore infectivity from within-host  
382 processes ( $u$ , mechanism 2) and spore yield ( $\sigma$ , mechanism 3) had no effect (Fig. 5C vs. Fig. 5A)  
383 and very little effect (Fig. 5D vs. Fig. 5A) on transmission potential, respectively.

384

385

## DISCUSSION

386

387

388

389

390

391

392

393

394

395

396

397

We investigated upper thermal constraints on fungal epidemics in a *Daphnia* zooplankton host. The seasonality of the autumnal epidemics suggested that hot conditions might constrain disease: epidemics usually start after lakes cool from maximal summer temperatures in the epilimnion (29-32°C). We tested five potential thermal constraints on transmission. First, foraging (exposure) rate of hosts ( $f$ ) increased at high temperatures (Fig 2B), while, second, high temperatures did not affect the infectivity of spores from within-host processes ( $u$ ; Fig 2C). Thus, high temperatures increased transmission rate,  $\beta$  (where  $\beta=uf$ ; Fig 2A). Third, spore yield ( $\sigma$ ) declined slightly at 32°C (Fig 3A). Fourth, a rearing effect on spore quality driven by temperature during the previous infection ( $\rho$ ) emerged: spores made at 32°C were less infectious than those made at 26°C and sometimes 20°C (for one of two spore sources, Fig 4A). Finally, harm to free-living spores ( $\varphi$ ) lowered infectivity as temperature increased (Fig 4B). Overall, transmission potential is much lower at 32°C than at 26°C, but still similar to at 20°C (Fig 5A), a

398 temperature that easily supports epidemics in both nature (Shocket, Strauss, et al., 2018) and  
399 laboratory environments (Civitello et al., 2012; Shocket, Strauss, et al., 2018). Thus, it seems that  
400 maximally high temperatures do constrain disease, but not sufficiently to explain the absence of  
401 summer epidemics on their own.

402         Contrary to our initial hypothesis, high temperatures *increased* transmission rate (Fig  
403 2A). In principle, high temperatures can lower infection success if pathogens tolerate heat less  
404 well than hosts (Thomas & Blanford, 2003). For instance, many ectothermic hosts behaviorally  
405 induce fever to reduce the negative costs of infection (Anderson et al., 2013; Carruthers et al.,  
406 1992; Elliot, Blanford, & Thomas, 2002; Thomas & Blanford, 2003). Further, fungi are  
407 particularly sensitive to high temperatures compared to other pathogen taxa (Robert &  
408 Casadevall, 2009) and fungal pathogens are often limited by temperature (Berger et al., 2004;  
409 Carruthers et al., 1992; Langwig et al., 2015; Raffel et al., 2010; Thomas & Blanford, 2003).  
410 However, high temperatures did not interfere with this fungus's success at either stage of  
411 transmission: the day of exposure, when most spores penetrate the host's gut, or infection  
412 establishment, when the fungus develops and replicates within the host (Stewart Merrill &  
413 Cáceres, 2018). Instead, high temperatures elevated host foraging rate (Fig 2B), which increases  
414 exposure to parasites, thereby increasing transmission rate (Hall et al., 2007). In lakes, the  
415 thermal response of foraging (exposure) drives variation in the size of epidemics, which occur in  
416 autumn: epidemics that start earlier in warmer conditions grow larger than those starting later  
417 and colder (Shocket, Strauss, et al., 2018). This foraging-controlled exposure to parasites is a  
418 potentially general mechanism: higher temperatures increase outbreak size for armyworms that  
419 consume virus particles on leaves (Elder & Reilly, 2014). However, transmission plateaued  
420 with temperature for another ingested *Daphnia* pathogen (Vale, Stjernman, & Little, 2008).

421 Spore yield ( $\sigma$ ) declined at the highest temperature (32°C; Fig. 3). Although the effect on  
422 transmission potential was minimal (Fig 5D), the results for related traits provide mechanistic  
423 insights into host-parasite interactions. Parasite burdens often decline at temperatures near the  
424 thermal maxima of the host and/or parasite, e.g., for nematodes in slugs (Wilson, Digweed,  
425 Brown, Ivanonva, & Hapca, 2015), trematodes in snails (Paull, Lafonte, & Johnson, 2012),  
426 bacteria in *Daphnia* (Vale et al., 2008) and fruit flies (Lazzaro, Flores, Lorigan, & Yourth, 2008),  
427 and powdery mildew in plants (Laine, 2007). In theory, reduced parasite production at hot  
428 temperatures could arise from several mechanisms. First, parasite production could decline if  
429 host growth slows, since spore yield often scales with host growth, at least along resource  
430 gradients (Hall, Knight, et al., 2009; Hall, Simonis, et al., 2009). However, here host growth rate  
431 ( $g_h$ ) increased with temperature while spore yield was flat and then decreased (Fig 3B).  
432 Therefore, spore production was decoupled from host growth rate (i.e., the link based on  
433 resources did not apply for temperature). Second, the parasite itself could grow more slowly at  
434 high temperatures. For example, high temperatures slow bacterial growth inside fruit flies  
435 (Lazzaro et al., 2008), fungal growth in grasshoppers (Springate & Thomas, 2005), and fungal  
436 growth on warm-adapted (but not cold-adapted) amphibians (Cohen et al., 2017). In contrast,  
437 here parasite growth rate ( $g_p$ ) did not respond to temperature (slope in Fig 3D; Fig 3E).

438 Instead, the decline in spore production at high temperatures arose from a combination of  
439 host death rate and the timing of initial spore production. Temperature determined spore load on  
440 day 8 (the earliest sampling time in the assay; Fig. 3D). Based on that information (and the  
441 constant parasite growth rates, Fig 3E), we infer that spore production began earliest at 26°C,  
442 followed by 32°C, and then 20°C. These head starts were maintained over time and explain the  
443 spore yield pattern when combined with death rate of infected hosts (Fig. 3C). In general, shorter

444 lifespan of infected hosts decreases time for spore production, thereby depressing spore yield  
445 (Auld et al., 2014; Civitello et al., 2012). Here, spore yield was lower at 32 than 26°C because  
446 spore production started later and hosts died more quickly. At 20°C, spore production started  
447 even later, but longer host lifespan compensated for this delay (i.e., the fungus had longer to  
448 grow within hosts). Do similar patterns exist in other systems? Unfortunately, few studies focus  
449 on traits underlying thermal responses of parasite load. Hence questions remain: How often does  
450 temperature change the timing versus the rate of parasite production? How often does  
451 temperature decouple positive relationships between host growth and parasite production? The  
452 answers matter because spore yield can influence epidemic size for obligate killer parasites (like  
453 the fungus here: Civitello et al., 2015). Thus, developing a general framework from data across  
454 host-parasite systems remains a fruitful area for future research.

455         High temperatures reduced transmission potential via two effects on spore infectivity that  
456 act outside the focal host. First, a rearing effect on spore quality ( $\rho$ ) driven by temperature of  
457 spore production in the previous host elevated (26°C) and then lowered (32°C) spore infectivity  
458 (compared to 20°C). Rearing effects on parasite performance can arise with variation in  
459 resources consumed by hosts (Cornet, Bichet, Larcombe, Faivre, & Sorci, 2014; Little, Birch,  
460 Vale, & Tseng, 2007; Tseng, 2006), temperature experienced by hosts (Shocket, Vergara, et al.,  
461 2018), or host genotype (Searle et al., 2015). These understudied rearing effects may drive  
462 performance of parasites to an unappreciated extent (Shocket, Vergara, et al., 2018). Second,  
463 harm to free-living spores ( $\phi$ , including spore mortality) also inhibited infection at high  
464 temperatures. After seven days in 30°C, spores lost 92% of their initial infectivity. This  
465 constraint may arise in other systems: for example, high temperatures elevate mortality in free-  
466 living helminths of Arctic ungulates (Molnár et al., 2013). However, in the planktonic system

467 here, 7-day result likely exaggerates the thermal constraint. While difficult to quantify, physical  
468 sinking, consumption (Civitello, Pearsall, Duffy, & Hall, 2013; Penczykowski, Hall, et al., 2014;  
469 Shocket, Vergara, et al., 2018; Strauss, Civitello, Cáceres, & Hall, 2015) and damage from  
470 radiation (Overholt et al., 2012) likely remove most spores before 7 days. To acknowledge this  
471 mortality, we weighted this component of infectivity ( $\varphi$ ) using a model of spore longevity.  
472 Assuming this modeled weighting reflects reality in lakes, this free-living effect lacks enough  
473 strength to inhibit epidemics during summer, even when combined with the other mechanisms  
474 (see Appendix for sensitivity analysis of the time-weighting model). However, more realistic  
475 dynamical models and better resolved trait data for the free-living spore effect could change the  
476 estimates for how high temperatures affect transmission.

477         Although the impact of temperature on these five mechanisms alone does not explain the  
478 lack of epidemics during summer, other co-varying environmental factors could combine with  
479 thermal effects to sufficiently inhibit transmission. Such factors include damage to free-living  
480 spores by solar radiation (Overholt et al., 2012), consumption of spores by resistant zooplankton  
481 species that are more abundant earlier in the year (Penczykowski, Hall, et al., 2014), and low  
482 spore production due to poor quality of host food resources (Hall, Knight, et al., 2009). All of  
483 these mechanisms could contribute to the observed field pattern, and interact with the thermal  
484 effects examined here. Furthermore, covariation among drivers could be disrupted by climate  
485 change. For example, high temperatures may persist later in the year when damaging solar  
486 radiation is less intense. Incorporating the impacts of these other environmental factors may help  
487 explain the current field pattern and improve predictions for the impact of climate change on  
488 epidemics. However, any predictions for climate change and disease will need to explicitly  
489 account for the effects of temperature variation and extremes.

490 Thermal variation and extremes have important and distinct impacts on organismal  
491 performance. Variation changes trait values compared to constant temperatures with the same  
492 mean (Dowd, King, & Denny, 2015). In most cases, thermal variation can be reasonably  
493 incorporated using nonlinear averaging based on Jensen's Inequality ('JI'; Bernhardt, Sunda,  
494 Thompson, & O'Connor, 2018; Ruel & Ayres, 1999). JI predicts that variation should generally  
495 increase traits at cooler temperatures (below a trait optimum) and decrease them at higher  
496 temperatures (above a trait optimum), and is supported empirically (Bernhardt et al., 2018;  
497 Paaajmans et al., 2010, 2013). Beyond JI, extreme temperatures can cause additional effects via  
498 acute thermal stress (Dowd et al., 2015). For instance, limits of species ranges may depend more  
499 on tolerance of episodic thermal extremes than on the thermal responses of life history traits  
500 (Overgaard, Kearney, & Hoffmann, 2014). Our study did not include perspectives based on JI or  
501 extremes. We employed a relevant form of thermal variation, mimicking migratory behavior of  
502 hosts in stratified lakes. However, we did not intend to isolate effects of thermal variation or to  
503 expose hosts to thermal extremes. Future efforts could estimate both to better predict the impact  
504 of climate change on the host, the parasite, and their interaction.

505 The current prevailing view argues that hot temperatures should constrain disease  
506 transmission in nature (Altizer et al., 2013; Lafferty, 2009; Lafferty & Mordecai, 2016). This  
507 constraint arises when unimodal thermal reaction norms depress key traits that drive disease  
508 spread. However, such constraints have been rigorously tested in only a handful of systems.  
509 Here, we hypothesized that high summer temperatures limit transmission of a zooplankton-  
510 fungus disease system with autumnal epidemics (i.e., during cooler conditions). High  
511 temperatures constrained disease transmission enough to produce a unimodal thermal response.  
512 This response arose primarily through a rearing effect on spore quality and due to harm to free-

513 living spores. However, the thermal mechanisms estimated here were not sufficient explain the  
514 lack of summer epidemics. Hence, we draw two major lessons. First, we need to continue to  
515 rigorously evaluate multiple mechanisms of thermal constraints on components of disease  
516 transmission. Second, our example cautions against drawing conclusions about constraints on  
517 disease from warming based on field patterns and theory alone.

518

519

### **ACKNOWLEDGMENTS**

520 K. Boatman (2009 and 2010), Z. Brown and K. Malins (2011), O. Schmidt (2013), A.  
521 Bowling (2014), and P. Orlando and J. Walsman (2015) conducted field sampling. MSS was  
522 supported by NSF GRFP. This work was supported by NSF DEB 0841679, 0841817, 1120316,  
523 1120804, 1353749, and 1354407.



524 **Table 1:** The experiments (and spore sources) used to test the five mechanistic components of  
525 disease transmission.

526

| <b>Mechanism</b>                                                         | <b>Experiment(s)</b>                                                  | <b>Spore source(s)</b>                                                |
|--------------------------------------------------------------------------|-----------------------------------------------------------------------|-----------------------------------------------------------------------|
| 1. Foraging rate<br>( $f$ , Fig. 2B)                                     | Foraging rate assay                                                   | NA                                                                    |
| 2. Within-host spore infectivity<br>( $u$ , Fig. 2C)                     | $\beta + u$ measurement assay<br>Foraging rate assay                  | General lab stock                                                     |
| 3. Spore yield<br>( $\sigma$ , Fig. 3A)                                  | $\beta + u$ measurement assay<br>Within-host parasite growth<br>assay | General lab stock                                                     |
| 4. Rearing effect on infectivity<br>( $\rho$ , Fig 4A,C)                 | Common garden infection<br>assay #1                                   | $\beta + u$ measurement assay<br>Within-host parasite growth<br>assay |
| 5. Free-living spore effect on<br>infectivity<br>( $\varphi$ , Fig 4B,D) | Common garden infection<br>assay #2                                   | General lab stock incubated<br>at different temperatures              |

527

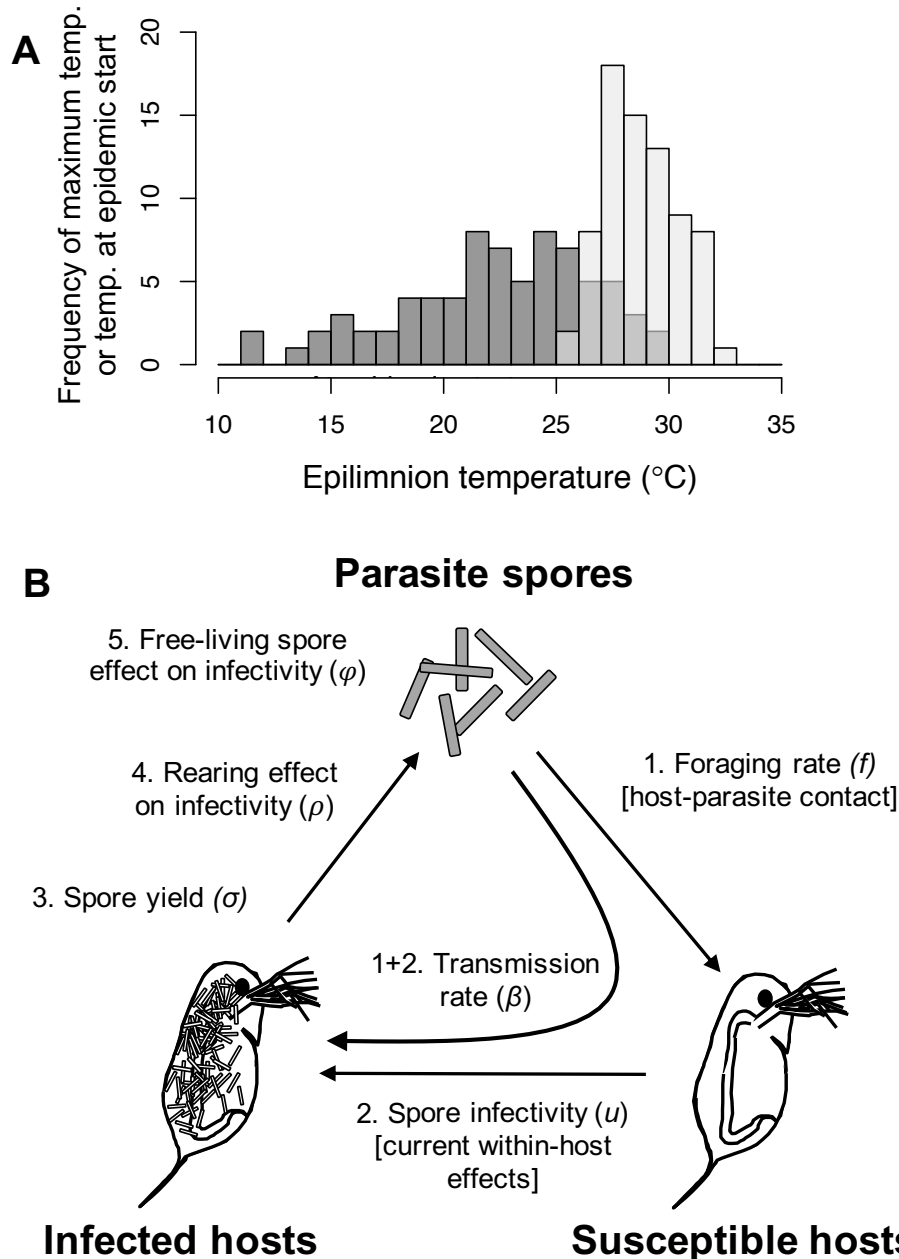

528

529

530 **Figure 1: Motivating field pattern and mechanistic components of transmission.** (A) Fungal

531 epidemics usually start (dark grey bars) after lakes have cooled from the maximum summer

532 temperature (light grey bars). Epidemics never started when the epilimnion (upper, warmer

533 layer) was hotter than 30°C, suggesting an upper thermal constraint. Data summarize 74

534 epidemics from 20 lakes in Indiana (USA) sampled from 2009-2015. (B) High temperature could

535 limit transmission via five mechanisms. 1-2) Hosts become infected at transmission rate  $\beta$ , which

536 can be divided into 1) host foraging rate ( $f$ ), i.e., exposure to spores, and 2) spore infectivity, as

537 determined by within-host processes ( $u$ ). 3) Parasite spores are produced at spore yield ( $\sigma$ ). 4) A

538 rearing effect from temperature during the previous infection ( $\rho$ ) determines initial spore

539 infectivity. 5) Harm to free-living spores ( $\varphi$ ) might also impact their infectivity. The product of

all five components ( $f u \sigma \rho \varphi$ ) determines ‘transmission potential’.

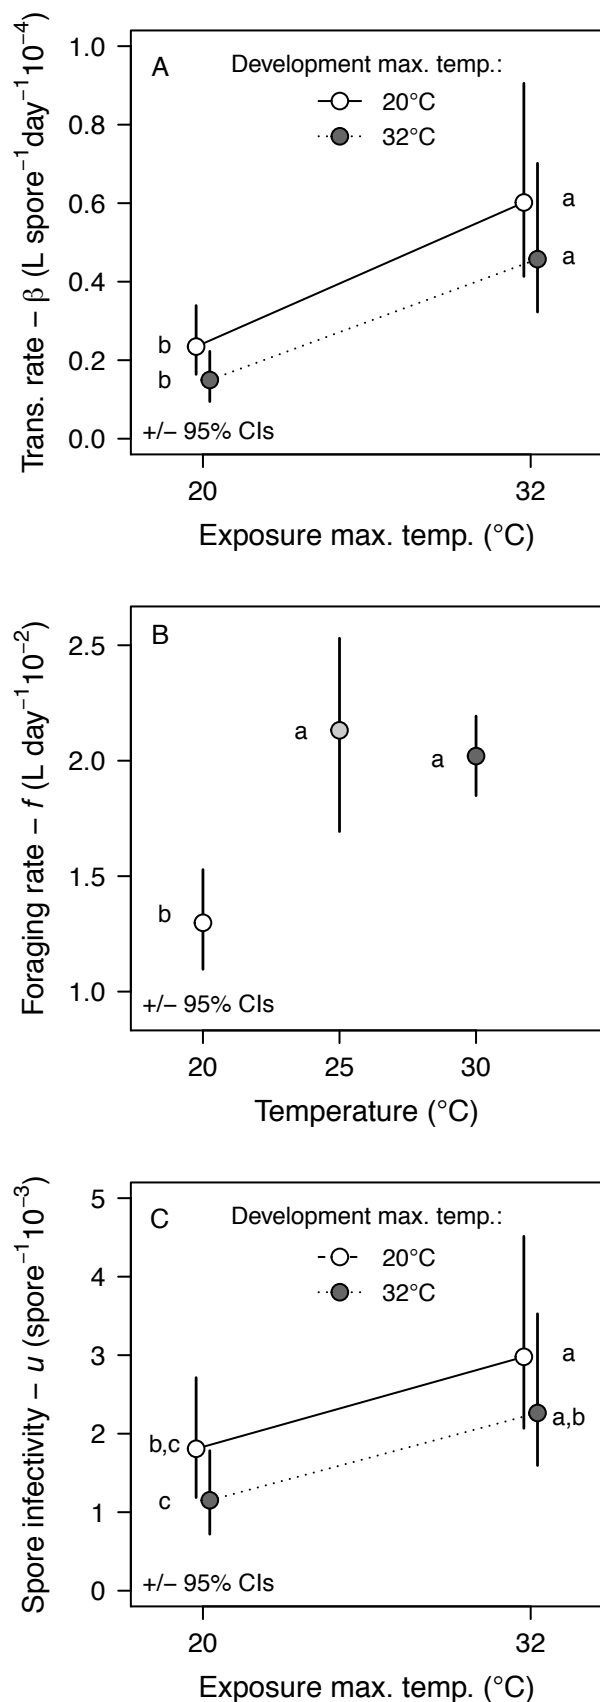

**Figure 2: High temperature impacts on transmission rate ( $\beta$ ), foraging rate ( $f$ , mechanism 1) and spore infectivity from current within-host processes ( $u$ , mechanism 2).** In A and C, the effect of high temperature during parasite exposure and infection establishment (20°C infection establishment = white circles, solid line; 32°C infection establishment = dark grey circles, dotted line). (A) Transmission rate ( $\beta$ ) increased when hosts were exposed at 32°C and did not change with infection establishment temperature. For constant temperatures, transmission is higher at 32°C than at 20°C. (B) Foraging (exposure) rate of hosts ( $f$ ) is higher at 26°C (light grey) and 32°C (dark grey) than at 20°C (white). (C) Spore infectivity ( $u = \beta/f$ ) increased when hosts were exposed at 32°C for both infection establishment temperatures. However, for constant temperatures, infectivity did not differ between 20 and 32°C. Error bars show 95% CIs. Letters indicate significant differences.

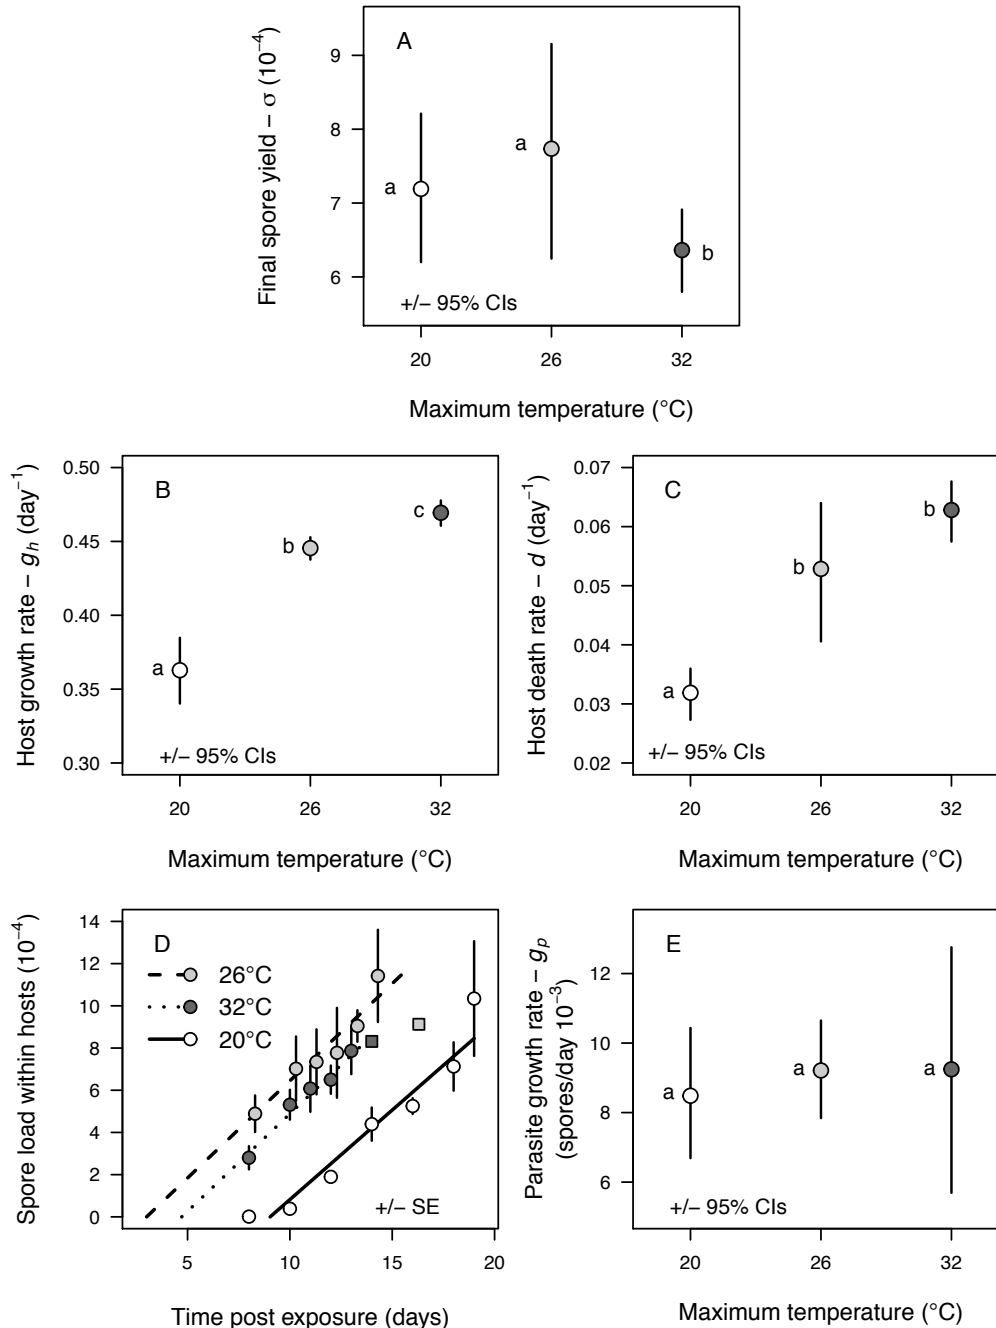

565  
 566 **Figure 3: High temperature impacts on spore yield ( $\sigma$ , mechanism 3) and possible**  
 567 **underlying traits.** (A) Final spore yield at host death ( $\sigma$ ) was lower at 32 $^{\circ}\text{C}$  (dark grey) than at  
 568 20 $^{\circ}\text{C}$  (white) or 26 $^{\circ}\text{C}$  (light grey). (B) Host growth rate ( $g_h$ ) increased with temperature for all  
 569 treatments. (C) Death rate of infected hosts ( $d$ ) increased from 20 to 26 $^{\circ}\text{C}$  and trended higher  
 570 from 26 to 32 $^{\circ}\text{C}$ . (D) Spore load within hosts through time at 32 $^{\circ}\text{C}$  (dotted line), 26 $^{\circ}\text{C}$  (dashed  
 571 line), and 20 $^{\circ}\text{C}$  (solid line), fit with linear models. 26 $^{\circ}\text{C}$  points are shifted over for visual clarity  
 572 of error bars. (E) Parasite growth rate ( $g_p$ , slopes of lines in panel D) did not change with  
 573 temperature. Hence, declining  $\sigma$  stems from higher death rate of infected hosts and low initial  
 574 parasite growth, not slower growth rates of hosts or parasites. (A-C,E) Error bars show 95% CIs.  
 575 (D) Error bars show SE; square points are single hosts. Letters indicate significant differences.

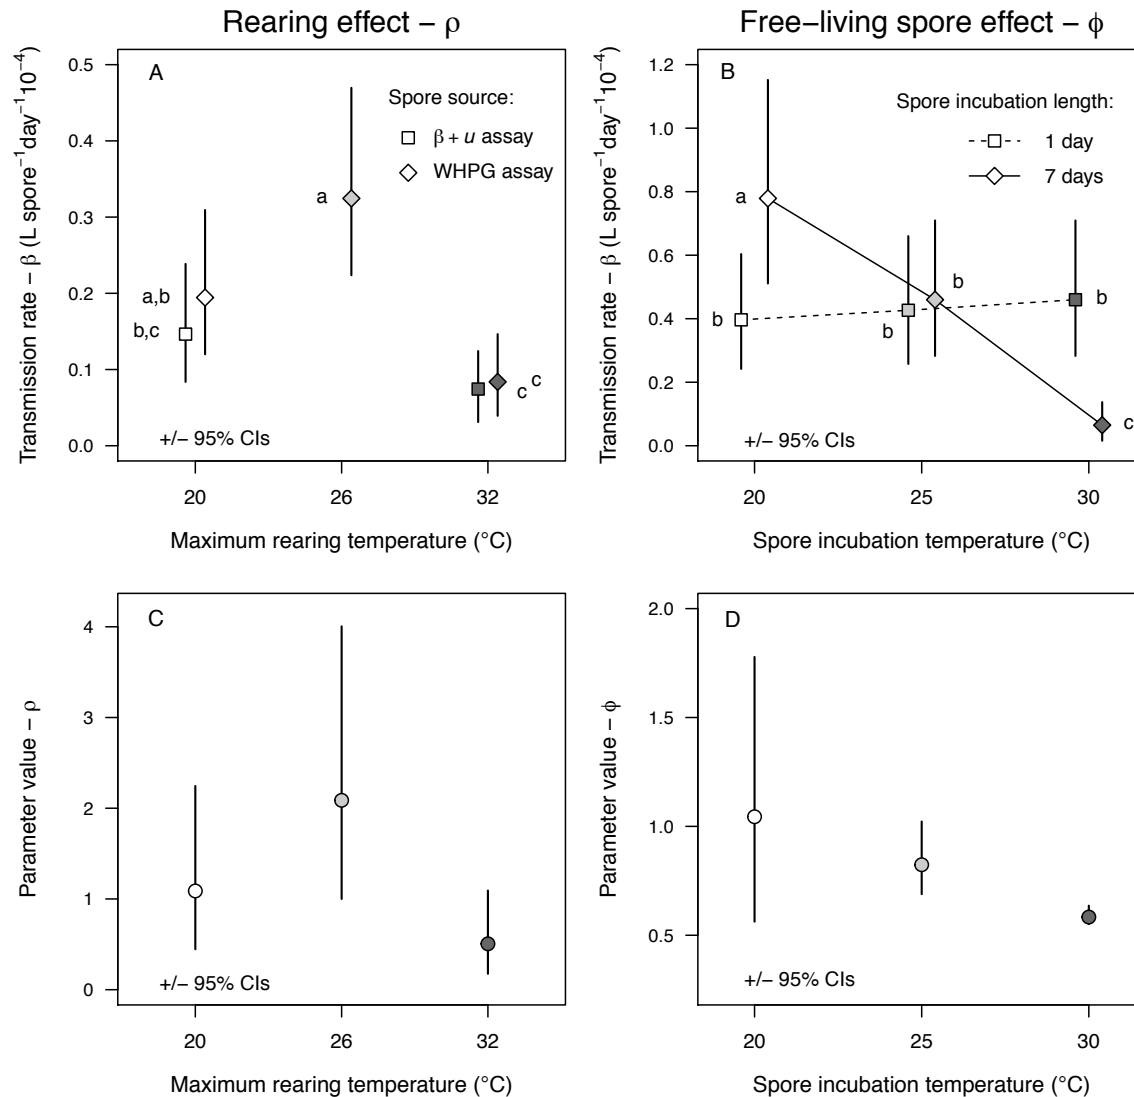

576  
577  
578  
579  
580  
581  
582  
583  
584  
585  
586  
587  
588  
589

**Figure 4: High temperature impacts on a rearing effect ( $\rho$ , mechanism 4) and harm to free-living spores ( $\phi$ , mechanism 5).** Variation in transmission rate from common garden infection assays reflects differences in spore infectivity. (A) Spores came from the  $\beta + u$  measurement assay (Fig. 2; squares) and the within host parasite growth assay (‘WHPG’; Fig. 3; diamonds). Spore infectivity increased with rearing temperature from 20°C (white) to 26°C (light grey;  $\beta + u$  only) and decreased with rearing temperatures from 26°C to 32°C (dark grey, both spore sources). Spore infectivity was lower at 32°C than at 20°C (WHPG spores only). (B) Spore infectivity decreased when free-living spores were incubated in high temperatures for 7 days but not for 1 day. Storage at 4°C for 6 days (for all 1-day incubations) also lowered spore infectivity relative to the 7-day incubation at 20°C. (C-D) Parameter values (transmission rate scaled by values at 20°C) for (C) rearing effect,  $\rho$ , and (D) free-living effect,  $\phi$ . Phi values also based on time-weighted model (see text for details). Error bars show 95% CIs. Letters indicate significant differences.

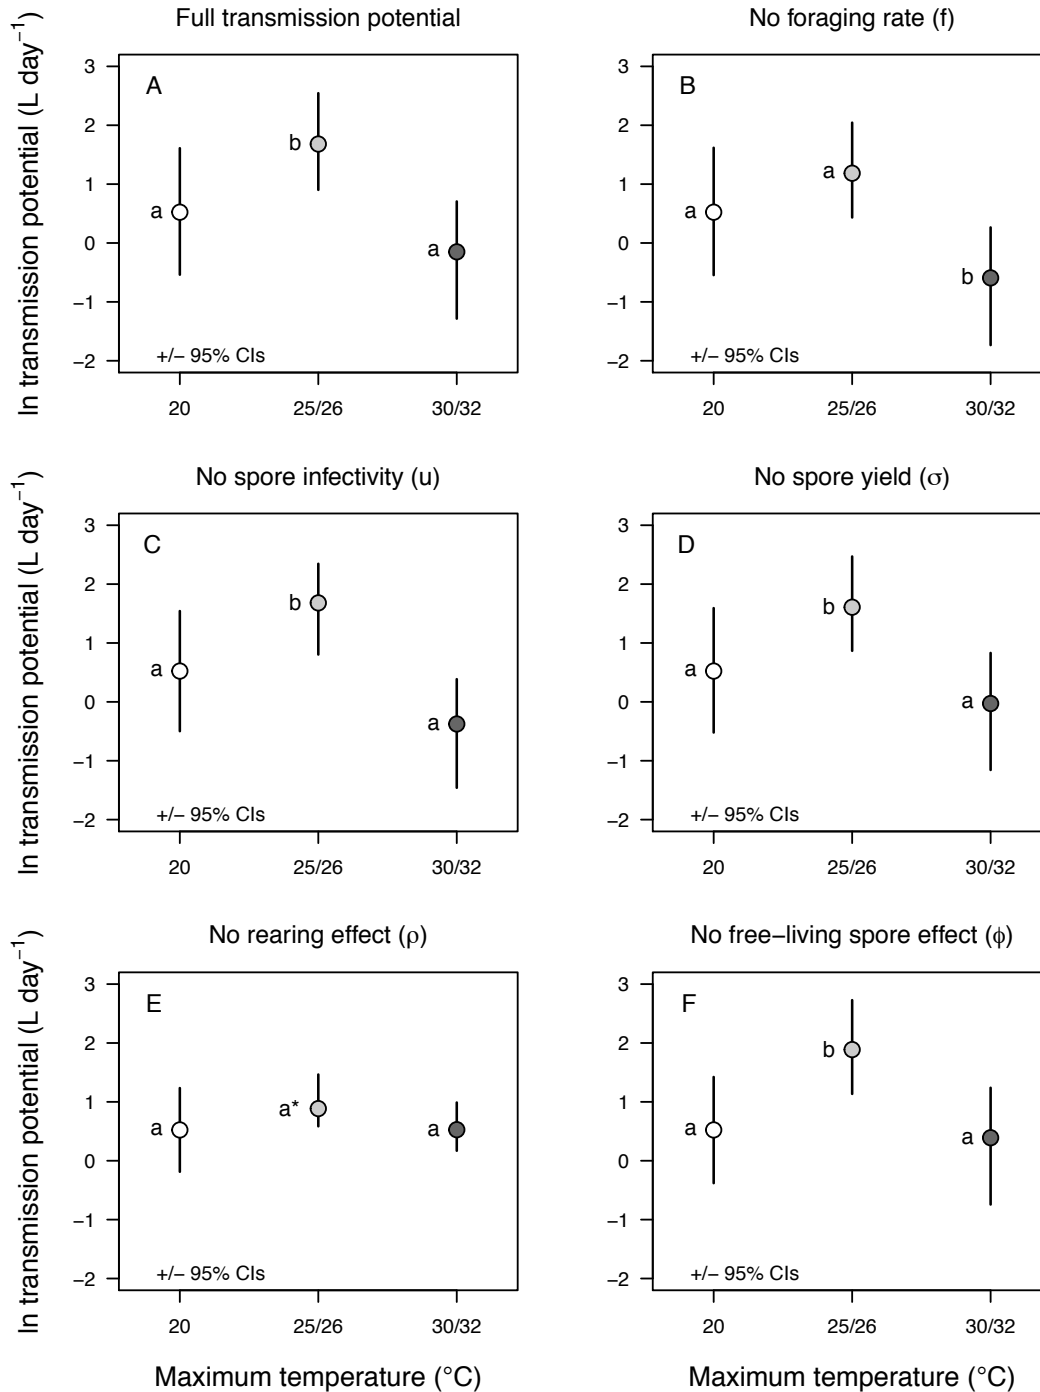

590

591 **Figure 5: High temperature impacts on transmission potential.** (A) Transmission potential

592 ( $f u \sigma \rho \phi$ ) responds unimodally, increasing from 20°C (white) to 25/26°C (light grey) and

593 decreasing from 25/26°C to 30/32°C (dark grey). (B-F) Transmission potential with each

594 mechanism held constant to show sensitivity to each parameter: (B) foraging rate ( $f$ ), (C) spore

595 infectivity from within-host effects ( $u$ ), (D) spore yield ( $\sigma$ ), (E) rearing effect ( $\rho$ ), and (F) harm

596 free-living spores ( $\phi$ ). The rearing effect (E) has the largest impact on transmission potential

597 (hence, without it, the response of transmission potential is flat with temperature). Error bars

598 show 95% CIs. Letters indicate significant differences. Y-axis is ln-transformed.

599

## WORKS CITED

- 600 Allen, D. E., & Little, T. J. (2011). Dissecting the effect of a heterogeneous environment on the  
601 interaction between host and parasite fitness traits. *Evolutionary Ecology*, 25(2), 499–508.  
602 doi:10.1007/s10682-010-9413-2
- 603 Altizer, S., Dobson, A., Hosseini, P., Hudson, P., Pascual, M., & Rohani, P. (2006). Seasonality  
604 and the dynamics of infectious diseases. *Ecology Letters*, 9(4), 467–84. doi:10.1111/j.1461-  
605 0248.2005.00879.x
- 606 Altizer, S., Ostfeld, R. S., Johnson, P. T. J., Kutz, S., & Harvell, C. D. (2013). Climate change  
607 and infectious diseases: from evidence to a predictive framework. *Science*, 341(6145), 514–  
608 9. doi:10.1126/science.1239401
- 609 Anderson, R. D., Blanford, S., Jenkins, N. E., & Thomas, M. B. (2013). Discriminating Fever  
610 Behavior in House Flies. *PLoS ONE*, 8(4), e62269. doi:10.1371/journal.pone.0062269
- 611 Auld, S. K., Hall, S. R., Housley Ochs, J., Sebastian, M., & Duffy, M. A. (2014). Predators and  
612 patterns of within-host growth can mediate both among-host competition and evolution of  
613 transmission potential of parasites. *American Naturalist*, 184(S1), S77-90.  
614 doi:10.1086/676927
- 615 Berger, L., Speare, R., Hines, H. B., Marantelli, G., Hyatt, A. D., McDonald, K. R., ... Tyler, M.  
616 J. (2004). Effect of season and temperature on mortality in amphibians due to  
617 chytridiomycosis. *Australian Veterinary Journal*, 82(7), 434–439. doi:10.1111/j.1751-  
618 0813.2004.tb11137.x
- 619 Bernhardt, J. R., Sunda, y J. M., Thompson, P. L., & O'Connor, M. I. (2018). Nonlinear  
620 averaging of thermal experience predicts population growth rates in a thermally variable  
621 environment. *Proceedings of the Royal Society B: Biological Sciences*, 285(1886),  
622 20181076. doi:10.1098/rspb.2018.1076
- 623 Bolker, B. M., & R Development Core Team. (2017). *bbmle: Tools for General Maximum*  
624 *Likelihood Estimation*.
- 625 Boltaña, S., Rey, S., Roher, N., Vargas, R., Huerta, M., Anne, F., ... Mackenzie, S. (2013).  
626 Behavioural fever is a synergic signal amplifying the innate immune response Behavioural  
627 fever is a synergic signal amplifying the innate immune response. *Proceedings of the Royal*  
628 *Society B-Biological Sciences*, 280.
- 629 Carruthers, R. I., Larkin, T. S., & Firstencel, H. (1992). Influence of thermal ecology on the  
630 mycosis of a rangeland grasshopper. *Ecology*, 73(1), 190–204. doi:10.2307/1938731
- 631 Civitello, D. J., Forsy, P., Johnson, A. P., & Hall, S. R. (2012). Chronic contamination decreases  
632 disease spread: a *Daphnia*-fungus-copper case study. *Proceedings of the Royal Society B:*  
633 *Biological Sciences*, 279(May), 3146–3153. doi:10.1098/rspb.2012.0684
- 634 Civitello, D. J., Pearsall, S., Duffy, M. A., & Hall, S. R. (2013). Parasite consumption and host  
635 interference can inhibit disease spread in dense populations. *Ecology Letters*, 16(5), 626–34.

- 636 doi:10.1111/ele.12089
- 637 Civitello, D. J., Penczykowski, R. M., Smith, A. N., Shocket, M. S., Duffy, M. A., & Hall, S. R.  
638 (2015). Resources, key traits and the size of fungal epidemics in *Daphnia* populations.  
639 *Journal of Animal Ecology*, *84*, 1010–1017. doi:10.1111/1365-2656.12363
- 640 Cohen, J. M., Venesky, M. D., Sauer, E. L., Civitello, D. J., McMahon, T. A., Roznik, E. A., &  
641 Rohr, J. R. (2017). The thermal mismatch hypothesis explains host susceptibility to an  
642 emerging infectious disease. *Ecology Letters*, *20*(2), 184–193. doi:10.1111/ele.12720
- 643 Conti, B., Tabarean, I., Andrei, C., & Bartfai, T. (2004). Cytokines and Fever. *Frontiers in*  
644 *Bioscience*, *9*, 1433–1449.
- 645 Cornet, S., Bichet, C., Larcombe, S., Faivre, B., & Sorci, G. (2014). Impact of host nutritional  
646 status on infection dynamics and parasite virulence in a bird-malaria system. *Journal of*  
647 *Animal Ecology*, *83*(1), 256–265. doi:10.1111/1365-2656.12113
- 648 Dell, A. I., Pawar, S., & Savage, V. M. (2011). Systematic variation in the temperature  
649 dependence of physiological and ecological traits. *Proceedings of the National Academy of*  
650 *Sciences*, *108*(26), 10591–10596.
- 651 Dowd, W. W., King, F. A., & Denny, M. W. (2015). Thermal variation, thermal extremes and  
652 the physiological performance of individuals. *Journal of Experimental Biology*, *218*(12),  
653 1956–1967. doi:10.1242/jeb.114926
- 654 Ebert, D. (2005). *Ecology, epidemiology, and evolution of parasitism in Daphnia*. Bethesda:  
655 National Library of Medicine (USA), Center for Biotechnology Information.
- 656 Elderd, B. D., & Reilly, J. R. (2014). Warmer temperatures increase disease transmission and  
657 outbreak intensity in a host-pathogen system. *Journal of Animal Ecology*, *83*(4), 838–849.  
658 doi:10.1111/1365-2656.12180
- 659 Elliot, S. L., Blanford, S., & Thomas, M. B. (2002). Host-pathogen interactions in a varying  
660 environment: temperature, behavioural fever and fitness. *Proceedings of the Royal Society*  
661 *B: Biological Sciences*, *269*(1500), 1599–1607. doi:10.1098/rspb.2002.2067
- 662 Gatton, M. L., Kay, B. H., & Ryan, P. A. (2005). Environmental predictors of Ross River virus  
663 disease outbreaks in Queensland, Australia. *The American Journal of Tropical Medicine*  
664 *and Hygiene*, *72*(6), 792–9.
- 665 Gehman, A.-L. M., Hall, R. J., & Byers, J. E. (2018). Host and parasite thermal ecology jointly  
666 determine the effect of climate warming on epidemic dynamics. *Proceedings of the*  
667 *National Academy of Sciences*, *115*(4), 744–749. doi:10.1073/pnas.1705067115
- 668 Hall, S. R., Becker, C. R., Duffy, M. A., & Cáceres, C. E. (2011). Epidemic size determines  
669 population-level effects of fungal parasites on *Daphnia* hosts. *Oecologia*, *166*(3), 833–842.  
670 doi:10.1007/s00442-011-1905-4
- 671 Hall, S. R., Duffy, M. A., Tessier, A. J., & Cáceres, C. E. (2005). Spatial heterogeneity of  
672 daphniid parasitism within lakes. *Oecologia*, *143*, 635–644. doi:10.1007/s00442-005-0005-



673 8

- 674 Hall, S. R., Knight, C. J., Becker, C. R., Duffy, M. A., Tessier, A. J., & Cáceres, C. E. (2009).  
675 Quality matters: resource quality for hosts and the timing of epidemics. *Ecology Letters*,  
676 *12*(2), 118–128. doi:10.1111/j.1461-0248.2008.01264.x
- 677 Hall, S. R., Simonis, J. L., Nisbet, R. M., Tessier, A. J., & Cáceres, C. E. (2009). Resource  
678 Ecology of Virulence in a Planktonic Host-Parasite System: An Explanation Using  
679 Dynamic Energy Budgets. *The American Naturalist*, *174*(2), 149–162. doi:10.1086/600086
- 680 Hall, S. R., Sivars-Becker, L., Becker, C., Duffy, M. A., Tessier, A. J., & Cáceres, C. E. (2007).  
681 Eating yourself sick : transmission of disease as a function of foraging ecology. *Ecology*  
682 *Letters*, *10*, 207–218. doi:10.1111/j.1461-0248.2006.01011.x
- 683 Hall, S. R., Smyth, R., Becker, C. R., Duffy, M. A., Knight, C. J., MacIntyre, S., ... Cáceres, C.  
684 E. (2010). Why Are Daphnia in Some Lakes Sicker? Disease Ecology, Habitat Structure,  
685 and the Plankton. *BioScience*, *60*(5), 363–375. doi:10.1525/bio.2010.60.5.6
- 686 Hall, S. R., Tessier, A. J., Duffy, M. A., Huebner, M., & Cáceres, C. E. (2006). Warmer does not  
687 have to mean sicker: temperature and predators can jointly drive timing of epidemics.  
688 *Ecology*, *87*(7), 1684–95.
- 689 Hite, J. L., Penczykowski, R. M., Shocket, M. S., Strauss, A. T., Orlando, P. A., Duffy, M. A., ...  
690 Hall, S. R. (2016). Parasites destabilize host populations by shifting stage-structured  
691 interactions. *Ecology*, *97*(2), 439–449. doi:10.1890/15-1065.1
- 692 Kirk, D., Jones, N., Peacock, S., Phillips, J., Molnár, P. K., Krkošek, M., & Luijckx, P. (2018).  
693 Empirical evidence that metabolic theory describes the temperature dependency of within-  
694 host parasite dynamics. *PLOS Biology*, *16*(2), e2004608. doi:10.1371/journal.pbio.2004608
- 695 Kooijman, S. A. L. M. (2009). *Dynamic Energy Budget Theory for Metabolic Organisation* (3rd  
696 ed.). New York, New York: Cambridge University Press.
- 697 Lafferty, K. D. (2009). The ecology of climate change and infectious diseases. *Ecology*, *90*(4),  
698 888–900. doi:10.1890/09-1656.1
- 699 Lafferty, K. D., & Mordecai, E. A. (2016). The rise and fall of infectious disease in a warmer  
700 world. *F1000Research*, *5*.
- 701 Laine, A. L. (2007). Pathogen fitness components and genotypes differ in their sensitivity to  
702 nutrient and temperature variation in a wild plant-pathogen association. *Journal of*  
703 *Evolutionary Biology*, *20*(6), 2371–2378. doi:10.1111/j.1420-9101.2007.01406.x
- 704 Lampert, W. (1989). The adaptive significance of diel vertical migration of zooplankton.  
705 *Functional Ecology*, *3*(1), 21–27.
- 706 Lampert, W., & Trubetskova, I. (1996). Juvenile growth rate as a measure of fitness in Daphnia.  
707 *Functional Ecology*, *10*(5), 631–635.
- 708 Langwig, K. E., Frick, W. F., Reynolds, R., Parise, K. L., Drees, K. P., Hoyt, J. R., ... Kilpatrick,

- 709 A. M. (2015). Host and pathogen ecology drive the seasonal dynamics of a fungal disease,  
710 white-nose syndrome. *Proceedings of the Royal Society B: Biological Sciences*, 282(1799),  
711 20142335. doi:10.1098/rspb.2014.2335
- 712 Lazzaro, B. P., Flores, H. A., Lorigan, J. G., & Yourth, C. P. (2008). Genotype-by-environment  
713 interactions and adaptation to local temperature affect immunity and fecundity in  
714 *Drosophila melanogaster*. *PLoS Pathogens*, 4(3), 1–9. doi:10.1371/journal.ppat.1000025
- 715 Little, T., Birch, J., Vale, P., & Tseng, M. (2007). Parasite transgenerational effects on infection.  
716 *Evolutionary Ecology Research*, 9(3), 459–469.
- 717 Mangal, T. D., Paterson, S., & Fenton, A. (2008). Predicting the impact of long-term temperature  
718 changes on the epidemiology and control of schistosomiasis: a mechanistic model. *PloS*  
719 *One*, 3(1), e1438. doi:10.1371/journal.pone.0001438
- 720 McCallum, H., Fenton, A., Hudson, P. J., Lee, B., Levick, B., Norman, R., ... Lello, J. (2017).  
721 Breaking beta: deconstructing the parasite transmission function. *Philosophical*  
722 *Transactions of the Royal Society B: Biological Sciences*, 372, 20160084.  
723 doi:10.1098/rstb.2016.0084
- 724 McClain, E., Magnuson, P., & Warner, S. J. (1988). Behavioural fever in a Namib Desert  
725 tenebrionid beetle, *Onymacris plana*. *Journal of Insect Physiology*, 34(4), 279–284.  
726 doi:10.1016/0022-1910(88)90136-9
- 727 Molnár, P. K., Kutz, S. J., Hoar, B. M., & Dobson, A. P. (2013). Metabolic approaches to  
728 understanding climate change impacts on seasonal host-macroparasite dynamics. *Ecology*  
729 *Letters*, 16(1), 9–21. doi:10.1111/ele.12022
- 730 Mordecai, E. A., Cohen, J. M., Evans, M. V., Gudapati, P., Johnson, L. R., Lippi, C. A., ...  
731 Weikel, D. P. (2017). Detecting the impact of temperature on transmission of Zika, dengue,  
732 and chikungunya using mechanistic models. *PLOS Neglected Tropical Diseases*, 11(4),  
733 e0005568. doi:10.1371/journal.pntd.0005568
- 734 Mordecai, E. A., Paaijmans, K. P., Johnson, L. R., Balzer, C., Ben-Horin, T., de Moor, E., ...  
735 Lafferty, K. D. (2013). Optimal temperature for malaria transmission is dramatically lower  
736 than previously predicted. *Ecology Letters*, 16(1), 22–30. doi:10.1111/ele.12015
- 737 Niehaus, A. C., Angilletta, M. J., Sears, M. W., Franklin, C. E., & Wilson, R. S. (2012).  
738 Predicting the physiological performance of ectotherms in fluctuating thermal  
739 environments. *The Journal of Experimental Biology*, 215(Pt 4), 694–701.  
740 doi:10.1242/jeb.058032
- 741 Overgaard, J., Kearney, M. R., & Hoffmann, A. A. (2014). Sensitivity to thermal extremes in  
742 Australian *Drosophila* implies similar impacts of climate change on the distribution of  
743 widespread and tropical species. *Global Change Biology*, 20(6), 1738–1750.  
744 doi:10.1111/gcb.12521
- 745 Overholt, E. P., Hall, S. R., Williamson, C. E., Meikle, C. K., Duffy, M. A., & Cáceres, C. E.  
746 (2012). Solar radiation decreases parasitism in *Daphnia*. *Ecology Letters*, 15(1), 47–54.

- 747           doi:10.1111/j.1461-0248.2011.01707.x
- 748   Paaijmans, K. P., Blanford, S., Bell, A. S., Blanford, J. I., Read, A. F., & Thomas, M. B. (2010).  
749       Influence of climate on malaria transmission depends on daily temperature variation.  
750       *Proceedings of the National Academy of Sciences of the United States of America*, 107(34),  
751       15135–9. doi:10.1073/pnas.1006422107
- 752   Paaijmans, K. P., Heinig, R. L., Seliga, R. A., Blanford, J. I., Blanford, S., Murdock, C. C., &  
753       Thomas, M. B. (2013). Temperature variation makes ectotherms more sensitive to climate  
754       change. *Global Change Biology*, 19(8), 2373–2380. doi:10.1111/gcb.12240
- 755   Pascual, M., & Dobson, A. (2005). Seasonal patterns of infectious diseases. *PLoS Medicine*,  
756       2(1), 0018–0020. doi:10.1371/journal.pmed.0020005
- 757   Paull, S. H., Horton, D. E., Ashfaq, M., Rastogi, D., Kramer, L. D., Diffenbaugh, N. S., &  
758       Kilpatrick, A. M. (2017). Drought and immunity determine the intensity of West Nile virus  
759       epidemics and climate change impacts. *Proceedings of the Royal Society B: Biological*  
760       *Sciences*, 284(1848), 20162078. doi:10.1098/rspb.2016.2078
- 761   Paull, S. H., Lafonte, B. E., & Johnson, P. T. J. (2012). Temperature-driven shifts in a host-  
762       parasite interaction drive nonlinear changes in disease risk. *Global Change Biology*, 18(12),  
763       3558–3567. doi:10.1111/gcb.12018
- 764   Peña-García, V. H., Triana-Chávez, O., & Arboleda-Sánchez, S. (2017). Estimating Effects of  
765       Temperature on Dengue Transmission in Colombian Cities. *Annals of Global Health*, 83(3–  
766       4), 509–518. doi:10.1016/j.aogh.2017.10.011
- 767   Penczykowski, R. M., Hall, S. R., Civitello, D. J., & Duffy, M. A. (2014). Habitat structure and  
768       ecological drivers of disease. *Limnology and Oceanography*, 59(2), 340–348.  
769       doi:10.4319/lo.2014.59.2.0340
- 770   Penczykowski, R. M., Lemanski, B. C. P., Sieg, R. D., Hall, S. R., Housley Ochs, J., Kubanek,  
771       J., & Duffy, M. A. (2014). Poor resource quality lowers transmission potential by changing  
772       foraging behaviour. *Functional Ecology*, 28(5), 1245–1255. doi:10.1111/1365-2435.12238
- 773   Perkins, T. A., Metcalf, C. J. E., Grenfell, B. T., & Tatem, A. J. (2015). Estimating Drivers of  
774       Autochthonous Transmission of Chikungunya Virus in its Invasion of the Americas. *PLoS*  
775       *Current Outbreaks*, 1.  
776       doi:10.1371/currents.outbreaks.a4c7b6ac10e0420b1788c9767946d1fc
- 777   R Core Team. (2017). *R: A language and for statistical computing*. Vienna, Austria: R  
778       Foundation for Statistical Computing.
- 779   Raffel, T. R., Michel, P. J., Sites, E. W., & Rohr, J. R. (2010). What Drives Chytrid Infections in  
780       New Populations? Associations with Substrate, Temperature, and Shade. *EcoHealth*, 7(4),  
781       526–536. doi:10.1007/s10393-010-0358-2
- 782   Richards-Zawacki, C. L. (2009). Effects of slope and riparian habitat connectivity on gene flow  
783       in an endangered Panamanian frog, *Atelopus varius*. *Diversity and Distributions*, 15(5),  
784       796–806. doi:10.1111/j.1472-4642.2009.00582.x

- 785 Robert, V. A., & Casadevall, A. (2009). Vertebrate Endothermy Restricts Most Fungi as  
786 Potential Pathogens. *Journal of Infectious Diseases*, 200(10), 1623–1626.  
787 doi:10.1086/644642
- 788 Ruel, J. J., & Ayres, M. P. (1999). Jensen's inequality predicts effects of environmental  
789 variation. *Trends in Ecology & Evolution*, 14(9), 361–366. doi:10.1016/S0169-  
790 5347(99)01664-X
- 791 Sarnelle, O., & Wilson, A. E. (2008). Type III functional response in *Daphnia*. *Ecology*, 89(6),  
792 1723–1732. doi:10.1890/07-0935.1
- 793 Sauer, E. L., Fuller, R. C., Richards-Zawacki, C. L., Sonn, J., Sperry, J. H., & Rohr, J. R. (2018).  
794 Variation in individual temperature preferences, not behavioural fever, affects susceptibility  
795 to chytridiomycosis in amphibians. *Proceedings of the Royal Society B: Biological*  
796 *Sciences*, 285(1885), 20181111. doi:10.1098/rspb.2018.1111
- 797 Searle, C. L., Ochs, J. H., Cáceres, C. E., Chiang, S. L., Gerardo, N. M., Hall, S. R., & Duffy, M.  
798 A. (2015). Plasticity, not genetic variation, drives infection success of a fungal parasite.  
799 *Parasitology*, 142(06), 839–848. doi:10.1017/S0031182015000013
- 800 Shocket, M. S., Ryan, S. J., & Mordecai, E. A. (2018). Temperature explains broad patterns of  
801 Ross River virus transmission. *Elife*, 7, e37762.
- 802 Shocket, M. S., Strauss, A. T., Hite, J. L., Šljivar, M., Civitello, D. J., Duffy, M. A., ... Hall, S.  
803 R. (2018). Temperature Drives Epidemics in a Zooplankton-Fungus Disease System: A  
804 Trait-Driven Approach Points to Transmission via Host Foraging. *The American Naturalist*,  
805 191(4), 435–451. doi:10.1086/696096
- 806 Shocket, M. S., Vergara, D., Sickbert, A. J., Walsman, J. M., Strauss, A. T., Hite, J. L., ... Hall,  
807 S. R. (2018). Parasite rearing and infection temperatures jointly influence disease  
808 transmission and shape seasonality of epidemics. *Ecology*. doi:10.1002/ecy.2430
- 809 Springate, S., & Thomas, M. B. (2005). Thermal biology of the meadow grasshopper,  
810 *Chorthippus parallelus*, and the implications for resistance to disease. *Ecological*  
811 *Entomology*, 30(6), 724–732. doi:10.1111/j.0307-6946.2005.00743.x
- 812 Stahlschmidt, Z. R., & Adamo, S. A. (2013). Context dependency and generality of fever in  
813 insects. *Naturwissenschaften*, 100(7), 691–696. doi:10.1007/s00114-013-1057-y
- 814 Stewart Merrill, T. E., & Cáceres, C. E. (2018). Within-host complexity of a plankton-parasite  
815 interaction. *Ecology*.
- 816 Strauss, A. T., Civitello, D. J., Cáceres, C. E., & Hall, S. R. (2015). Success, failure and  
817 ambiguity of the dilution effect among competitors. *Ecology Letters*, 18(9), 916–926.  
818 doi:10.1111/ele.12468
- 819 Tesla, B., Demakovskiy, L. R., Mordecai, E. A., Ryan, S. J., Bonds, M. H., Ngonghala, C. N., ...  
820 Murdock, C. C. (2018). Temperature drives Zika virus transmission: evidence from  
821 empirical and mathematical models. *Proceedings of the Royal Society B: Biological*  
822 *Sciences*, 285(1884), 20180795.

- 823 Tessier, A. J., & Woodruff, P. (2002). Cryptic trophic cascade along a gradient of lake size.  
824 *Ecology*, 83(5), 1263–1270.
- 825 Thomas, M. B., & Blanford, S. (2003). Thermal biology in insect-parasite interactions. *Trends in*  
826 *Ecology & Evolution*, 18(7), 344–350. doi:10.1016/s0169-5347(03)00069-7
- 827 Tseng, M. (2006). Interactions between the parasite’s previous and current environment mediate  
828 the outcome of parasite infection. *The American Naturalist*, 168(4), 565–571.  
829 doi:10.1086/507997
- 830 Vale, P. F., Stjernman, M., & Little, T. J. (2008). Temperature-dependent costs of parasitism and  
831 maintenance of polymorphism under genotype-by-environment interactions. *Journal of*  
832 *Evolutionary Biology*, 21(5), 1418–1427. doi:10.1111/j.1420-9101.2008.01555.x
- 833 Wilson, M. J., Digweed, A. J., Brown, J., Ivanonva, E. S., & Hapca, S. H. (2015). Invasive slug  
834 pests and their parasites—temperature responses and potential implications of climate  
835 change. *Biology and Fertility of Soils*, 51(6), 739–748. doi:10.1007/s00374-015-1022-3
- 836 Zbikowska, E., Wrotek, S., Cichy, A., & Kozak, W. (2013). Thermal preferences of wintering  
837 snails *Planorbium corneum* (L.) exposed to lipopolysaccharide and zymosan. *Journal of*  
838 *Invertebrate Pathology*, 112(1), 57–61. doi:10.1016/j.jip.2012.08.011
- 839 Zimmerman, L. M., Vogel, L. A., & Bowden, R. M. (2010). Understanding the vertebrate  
840 immune system: insights from the reptilian perspective. *The Journal of Experimental*  
841 *Biology*, 213(5), 661–71. doi:10.1242/jeb.038315

842

## 843 SUPPORTING INFORMATION

844 Additional supporting information may be found in the online version of this article.

845 Appendix S1: Methods, Figures, and Tables

846 Figure S1: Components of a simple model used to estimate parameter  $\phi$ .

847 Figure S2: Sensitivity analysis for spore consumption model parameter ( $c$ ) affecting damage to  
848 free-living spores ( $\phi$ ) and transmission potential.

849 Table S1:  $p$ -values from randomization tests.

850 Table S2:  $p$ -values and  $\Delta$ AIC from model selection.

851 Table S3: PD (probability density) values for traits.

852 Table S4: PD (probability density) values for transmission potential ‘sensitivity analysis’  
853 calculations.
